# Supplementary material for: Laser frequency stabilization based on a universal sub-Doppler NICE-OHMS instrumentation for the potential application in atmospheric lidar
Source: Copernicus journal article supplement (doi:10.5194/amt-12-1807-2019), 2019-03-19
Supplement: Supplementary file [file amt-12-1807-2019-supplement-title-page.pdf › amt-12-1807-2019-supplement-title-page.pdf]

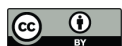

## *Supplement of*

# **Laser frequency stabilization based on a universal sub-Doppler NICE-OHMS instrumentation for the potential application in atmospheric lidar**

**Yueting Zhou et al.**

*Correspondence to:* Weiguang Ma ([mwg@sxu.edu.cn](mailto:mwg@sxu.edu.cn))

- [amt-12-1807-2019-supplement-title-page.pdf](#)
- [figure2.dat](#)
- [figure3\(a\).dat](#)
- [figure3\(b\).dat](#)
- [figure4\(a\).dat](#)
- [figure4\(b\).dat](#)
- [figure4\(c\).dat](#)

The copyright of individual parts of the supplement might differ from the CC BY 4.0 License.
